# Supplementary material for: Host heterozygosity and genotype rarity affect viral dynamics in an avian subspecies complex
Source: PubMed Central journal article supplement (PMC5645371; doi:10.1038/s41598-017-13476-z), 2017-10-17
Supplement: 41598_2017_13476_MOESM1_ESM.pdf [file 41598_2017_13476_MOESM1_ESM.pdf]

1 **ONLINE SUPPLEMENTARY INFORMATION**

2

3 **Host heterozygosity and genotype rarity affect viral dynamics in an avian**  
4 **subspecies complex**

5

6 **Authors:**

7 Justin R. Eastwood<sup>1, 2</sup>, Raoul F. H. Ribot<sup>1</sup>, Lee Ann Rollins<sup>1</sup>, Katherine L. Buchanan<sup>1</sup>, Ken Walder<sup>3</sup>,  
8 Andrew T. D. Bennett<sup>1</sup>, Mathew L. Berg<sup>1</sup>

9 **Affiliations:**

10 <sup>1</sup>Centre for Integrative Ecology, School of Life and Environmental Sciences, Deakin University, Geelong  
11 3216, Victoria, Australia.

12 <sup>2</sup> School of Biological Sciences, Monash University, Melbourne, Victoria, 3800, Australia.

13 <sup>3</sup> Metabolic Research Unit, School of Medicine, Deakin University, Geelong 3216, Victoria, Australia.

14 Corresponding author: [justin.eastwood@monash.edu.au](mailto:justin.eastwood@monash.edu.au)

15

16

17 **Supplementary Table S1:  $F_{st}$  values between each subspecies dyad calculated using Alequin.**

| Subspecies             | <i>P. e. elegans</i> | Western slopes hybrid | <i>P. e. flaveolus</i> | <i>P. e. adelaidae</i> |
|------------------------|----------------------|-----------------------|------------------------|------------------------|
| <i>P. e. elegans</i>   | 0.00                 | -                     | -                      | -                      |
| Western slopes hybrid  | 0.03                 | 0.00                  | -                      | -                      |
| <i>P. e. flaveolus</i> | 0.07                 | 0.04                  | 0.00                   | -                      |
| <i>P. e. adelaidae</i> | 0.02                 | 0.05                  | 0.06                   | 0.00                   |

18

19 **Supplementary Table S2:** Summary statistics of each loci used in this study assuming all subspecies  
 20 are one continuous population. Each loci was tested for linkage disequilibrium within each  
 21 subspecies. **Loci C12 had a high proportion of null alleles which ranged between 0.10 and 0.17 across**  
 22 **subspecies. Excluding C12 from the analysis did not influence the results of this study.**

| <b>Loci</b> | <b>Number of individuals</b> | <b>Number of alleles per locus</b> | <b>Allele size range</b> | <b>Estimated proportion of null alleles</b> | <b>Evidence of linkage disequilibrium?</b> |
|-------------|------------------------------|------------------------------------|--------------------------|---------------------------------------------|--------------------------------------------|
| AgGT07      | 359                          | 27                                 | 251-286                  | 0.1                                         | No                                         |
| Cp03E01     | 361                          | 23                                 | 184-234                  | 0.1                                         | No                                         |
| AgGT21      | 361                          | 4                                  | 315-328                  | 0.02                                        | No                                         |
| Cfor2627    | 362                          | 10                                 | 132-159                  | 0.04                                        | No                                         |
| C12         | 362                          | 6                                  | 61-78                    | 0.17                                        | No                                         |
| C13         | 363                          | 8                                  | 189-209                  | 0.09                                        | No                                         |
| CP52A09     | 359                          | 20                                 | 361-401                  | 0.04                                        | No                                         |
| Ero03       | 358                          | 12                                 | 192-218                  | 0.06                                        | No                                         |
| Ero08       | 362                          | 17                                 | 119-155                  | 0.01                                        | No                                         |

23

24 **Supplementary Table S3: Arlequin results for observed and expected heterozygosities used for testing**  
 25 **Hardy-Weinberg equilibrium for each subspecies (n = 363 individuals) at each of the nine microsatellite**  
 26 **loci. \* denotes significance after Bonferroni correction ( $P < 0.001$ ).**

| Loci            | Heterozygosity | <i>P. e. elegans</i> | Western Slopes | <i>P. e. flaveolus</i> | <i>P. e. adelaidae</i> | Pooled data |
|-----------------|----------------|----------------------|----------------|------------------------|------------------------|-------------|
| <b>AgGT07</b>   | $H_o$          | 0.83                 | 0.73           | 0.77                   | 0.71*                  | 0.75*       |
|                 | $H_e$          | 0.93                 | 0.85           | 0.88                   | 0.86                   | 0.92        |
| <b>CPO3E01</b>  | $H_o$          | 0.86                 | 0.49*          | 0.59                   | 0.86                   | 0.72*       |
|                 | $H_e$          | 0.90                 | 0.88           | 0.81                   | 0.88                   | 0.89        |
| <b>AgGT21</b>   | $H_o$          | 0.43                 | 0.33           | 0.17                   | 0.32                   | 0.33        |
|                 | $H_e$          | 0.41                 | 0.35           | 0.20                   | 0.31                   | 0.34        |
| <b>Cfor2627</b> | $H_o$          | 0.63                 | 0.63           | 0.54                   | 0.5                    | 0.58        |
|                 | $H_e$          | 0.69                 | 0.67           | 0.59                   | 0.52                   | 0.63        |
| <b>CI2</b>      | $H_o$          | 0.40                 | 0.29           | 0.27                   | 0.40                   | 0.35*       |
|                 | $H_e$          | 0.52                 | 0.40           | 0.34                   | 0.50                   | 0.50        |
| <b>CI3</b>      | $H_o$          | 0.55                 | 0.58           | 0.58                   | 0.51*                  | 0.55*       |
|                 | $H_e$          | 0.61                 | 0.63           | 0.67                   | 0.59                   | 0.65        |
| <b>CP52A09</b>  | $H_o$          | 0.78                 | 0.73           | 0.77                   | 0.79                   | 0.77*       |
|                 | $H_e$          | 0.81                 | 0.87           | 0.84                   | 0.82                   | 0.84        |
| <b>Ero03</b>    | $H_o$          | 0.70                 | 0.60           | 0.55                   | 0.66                   | 0.64*       |
|                 | $H_e$          | 0.73                 | 0.64           | 0.66                   | 0.75                   | 0.72        |
| <b>Ero08</b>    | $H_o$          | 0.87                 | 0.81           | 0.65                   | 0.73                   | 0.78*       |
|                 | $H_e$          | 0.84                 | 0.82           | 0.60                   | 0.76                   | 0.80        |

27

28 **Supplementary Table S4:** The set of candidate models considered in this study, ranked by the AIC<sub>c</sub>  
 29 values for each of the two response variables (lower AIC<sub>c</sub> values indicates greater support for  
 30 model). Addition sign represents delta AIC<sub>c</sub> compared to top model.

| Response variable     | Candidate models             | AIC <sub>c</sub> |
|-----------------------|------------------------------|------------------|
| BFDV infection status | Subspecies + Age + HL        | 222.54           |
|                       | Subspecies + Age + Sex + HL  | +0.59            |
|                       | Subspecies + Age + Sex       | +2.22            |
|                       | Subspecies + Age             | +2.51            |
|                       | Subspecies + Age + Sex + APR | +4.21            |
|                       | Subspecies + Age + APR       | +4.35            |
|                       | Subspecies + HL              | +11.94           |
|                       | Subspecies + Sex + HL        | +14.05           |
|                       | Subspecies                   | +14.72           |
|                       | Subspecies + APR             | +15.99           |
|                       | Subspecies + Sex             | +16.7            |
|                       | Subspecies + Sex + APR       | +17.98           |
|                       | Age + Sex                    | +37.14           |
|                       | Age + Sex + APR              | +38.39           |
|                       | Age + Sex + HL               | +38.95           |
|                       | Age                          | +40.36           |
|                       | Age + APR                    | +41.67           |
|                       | Age + HL                     | +41.74           |
|                       | Null (intercept only)        | +89.37           |
|                       | HL                           | +90.46           |
| Sex                   | +90.66                       |                  |
| APR                   | +91.16                       |                  |
| Sex + HL              | +91.99                       |                  |
| Sex + APR             | +92.47                       |                  |
| BFDV viral load       | Subspecies + Age + Sex + APR | 414.97           |
|                       | Subspecies + Age + Sex       | +1.56            |
|                       | Subspecies + Age + Sex + HL  | +3.8             |
|                       | Subspecies + Age + APR       | +4.32            |
|                       | Subspecies + Age             | +5.79            |
|                       | Subspecies + Sex + APR       | +6.15            |
|                       | Subspecies + Age + HL        | +7.29            |
|                       | Subspecies + APR             | +8.75            |
|                       | Subspecies + Sex             | +11.01           |
|                       | Subspecies + Sex + HL        | +12.8            |
|                       | Subspecies                   | +13.3            |
|                       | Subspecies + HL              | +14.31           |
|                       | Age + Sex                    | +23.23           |
|                       | Age + Sex + HL               | +25.01           |
|                       | Age + Sex + APR              | +25.32           |
|                       | Age                          | +28.88           |
|                       | Age + APR                    | +30.99           |
|                       | Age + HL                     | +31.07           |
|                       | Sex                          | +43.99           |
|                       | Sex + APR                    | +44.96           |
| Sex + HL              | +45.96                       |                  |
| Null (intercept only) | +46.41                       |                  |
| APR                   | +47.51                       |                  |
| HL                    | +48.53                       |                  |

31 APR = average pairwise relatedness, HL = homozygosity-by-loci,  $AIC_c$  = Akaike Information Criterion (corrected  
32 for small sample size)

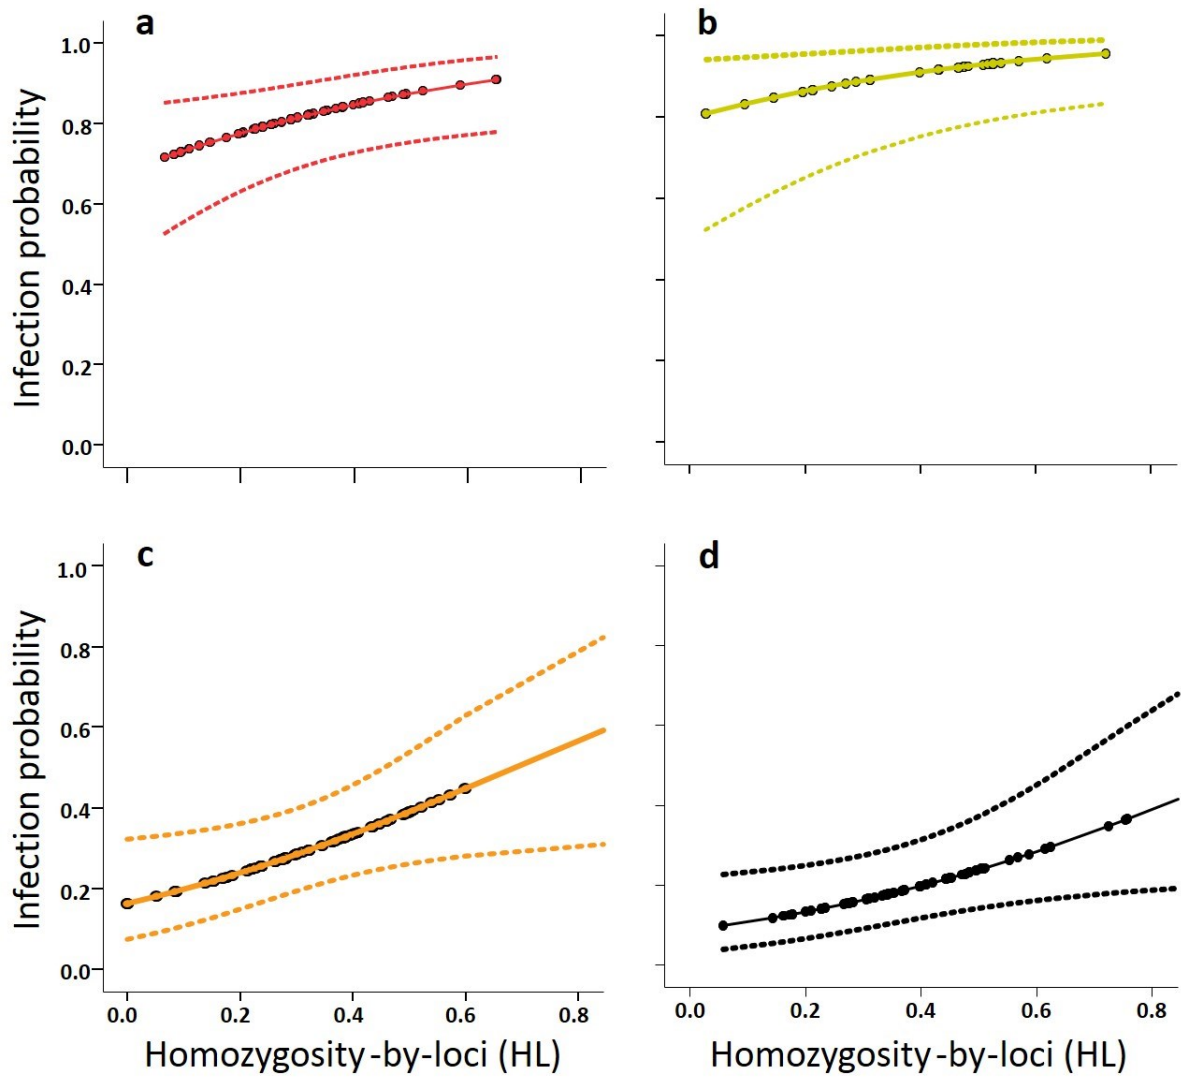

34

35 **Supplementary Figure S1:** The model predicted effects of individual host homozygosity (measured as36 homozygosity-by-loci) on the probability of infection with beak and feather disease virus in **(a)**37 *Platycercus elegans elegans*, **(b)** *P. e. flaveolus*, **(c)** *P. e. adelaidae*, and **(d)** the Westerns Slopes

38 population. Dotted lines indicate the 95% confidence interval, and circles indicate the levels of HL

39 sampled in this study. Effects are averaged over age classes and sexes.

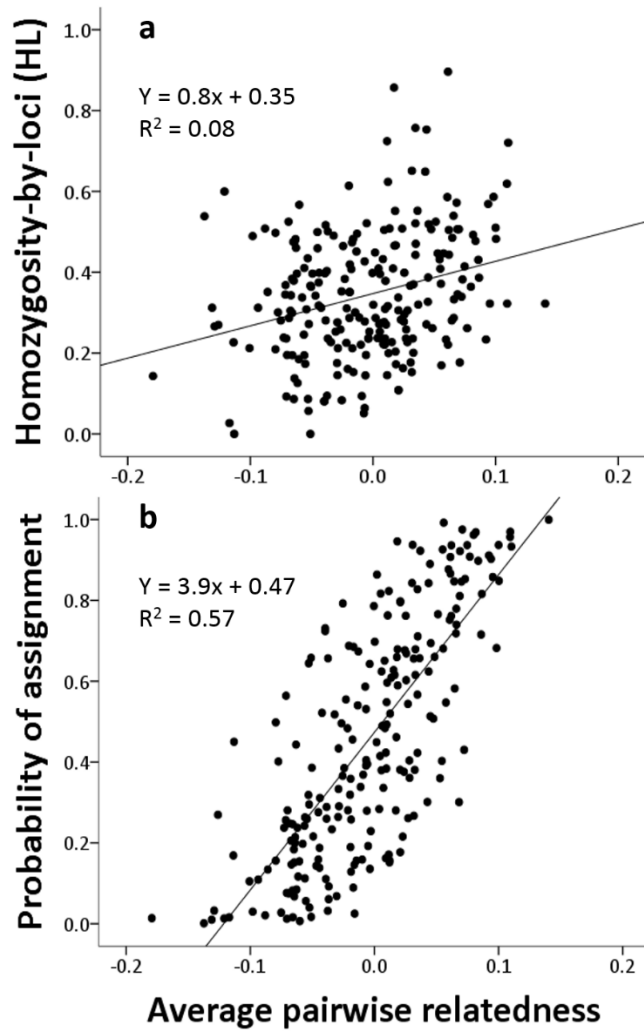

40

41 **Supplementary Figure S2:** To estimate an individual's genotype rarity within a population we  
 42 calculated average pairwise relatedness (APR; see methods). (a) APR was weakly correlated with  
 43 homozygosity-by-loci (HL) but explained only a small proportion of the variance. (b) The correlation  
 44 between APR and the probability of assignment index (see methods) was much higher. Linear  
 45 regression lines were calculated using ordinary least squares (N = 224).

46



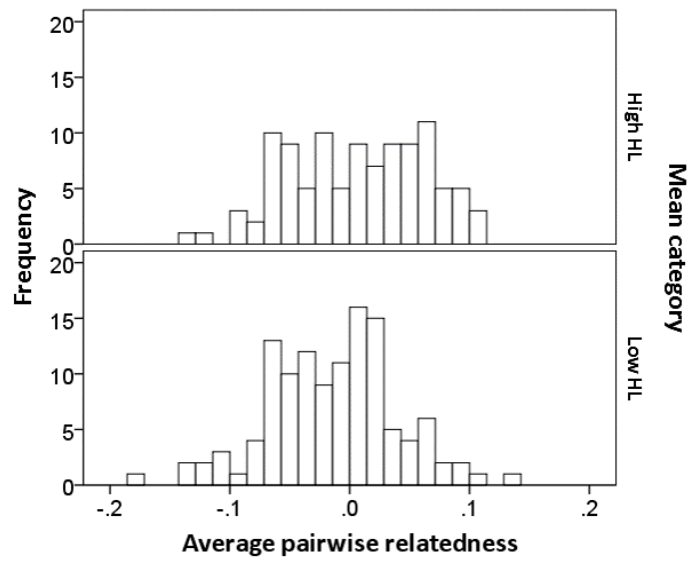

47

48 **Supplementary Figure S3:** The frequency distribution of average pairwise relatedness in two different  
 49 groups. High HL contains individuals with higher than average (Mean HL = 0.34) homozygosity-by-loci  
 50 (HL) values and Low HL contains individuals with lower than the average HL.

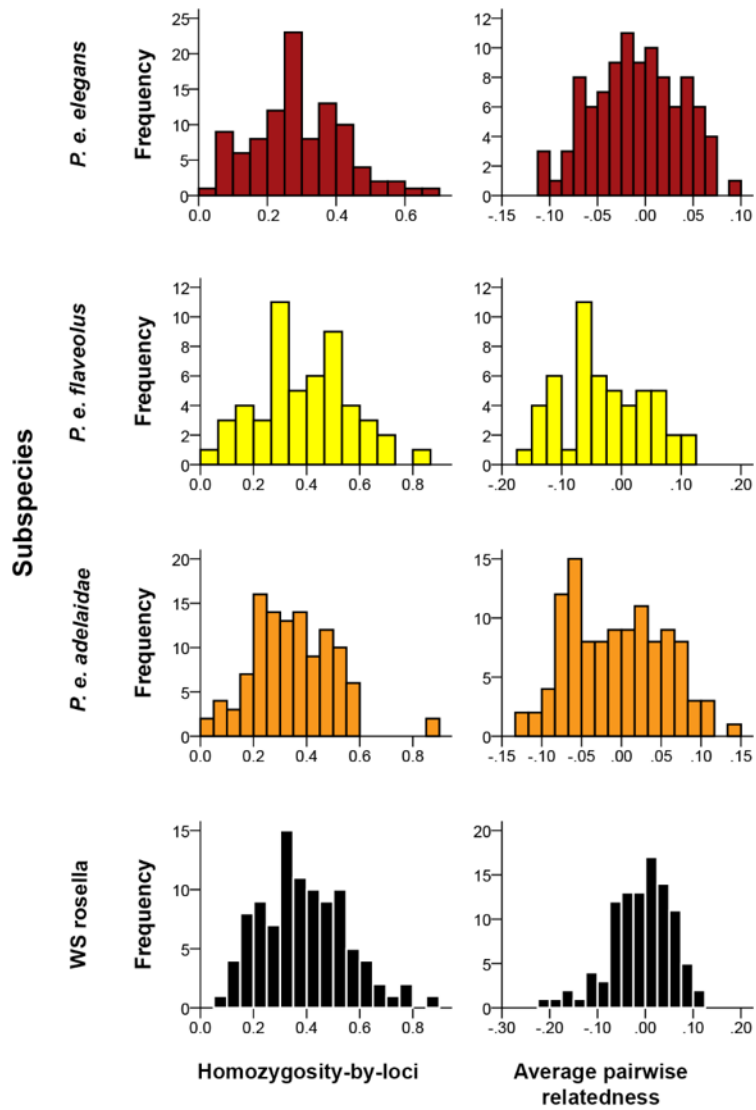

**Genetic diversity measure**

51

52 **Supplementary Figure S4:** Frequency distribution of each individual genetic diversity measure was

53 similar across populations (n = 363 individuals).

54
